# Supplementary material for: Strawberry Vein Banding Virus P6 Protein Is a Translation Trans-Activator and Its Activity Can be Suppressed by FveIF3g
Source: MDPI journal article supplement (doi:10.3390/v10120717), 2018-12-15
Supplement: s1 [file s1]

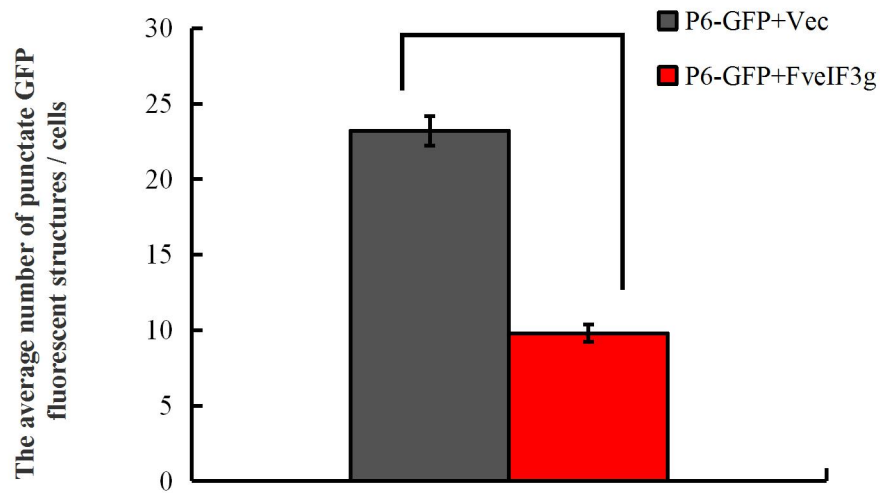

**Figure S2.** The average number of punctate GFP fluorescent structures in P6-GFP expressed cells compared to P6-GFP and FveIF3g co-expressed cells. The average number of GFP fluorescent granules counted in individual cells. A total of five cells were counted for each treatment under the fluorescent microscope, and each treatment repeat three times.
