# Supplementary material for: Strawberry Vein Banding Virus P6 Protein Is a Translation Trans-Activator and Its Activity Can be Suppressed by FveIF3g
Source: MDPI journal article supplement (doi:10.3390/v10120717), 2018-12-15
Supplement: s1 [file s1]

**Table S1:** Sequence of primers used for PCR amplifications.

| Primer                     | Nucleotide sequence (5'-3')            |
|----------------------------|----------------------------------------|
| pUS-F                      | <u>GAGCTC</u> ACTGTGGGTTAATTTC         |
| pUS-R                      | <u>ACTAGT</u> GACTGGGCGTCTTCAG         |
| pSY-F                      | <u>GAGCTC</u> ACCAAGGACCACTTTG         |
| pSY-R                      | <u>ACTAGT</u> TTGTAAAGCAGGGAGGTTTC     |
| USP71-F                    | <u>ACTAGT</u> ATGAGCCATTTTCATGAG       |
| USP71-R                    | <u>CCCGGGG</u> AAGATGTACTCGTCG         |
| SYP71-F                    | <u>ACTAGT</u> ATGAGCCATTTTCATGAGC      |
| SYP71-R                    | <u>CCCGGGG</u> AAGATGTACTCGTCTTG       |
| CaP71-F                    | <u>ACTAGT</u> ATGAATAGGTCTAAGACCAT     |
| CaP71-R                    | <u>CCCGGGT</u> TGCTCACCATGGATCCCCC     |
| FveIF3g-F                  | ATGAGACCAGGATCAGCA                     |
| FveIF3g-R                  | TTAATTGGGCCTGAGCCT                     |
| FveIF3g ( <i>Bam</i> HI)-F | <u>GGATCC</u> ATGAGACCAGGATCA          |
| FveIF3g-mcherry-F          | AGGCTCAGGCCCAATATGGTGAGCAAGGGC         |
| mcherry-FveIF3g-R          | GCCCTTGCTCACCATATTGGGCCTGAGCCT         |
| mcherry( <i>Sal</i> I)-R   | <u>GTCGAC</u> ACTCGGTACGCGCGGATCTTCCAG |
| FvL18 ( <i>Eco</i> RI)-F   | <u>GAATTC</u> ATGTCAGCGTCTCTT          |
| FvL18 ( <i>Bam</i> HI)-R   | <u>GGATCC</u> TTAGAATTGAAGACCGTT       |
| FvL18 ( <i>Sal</i> I)-F    | <u>GTCGAC</u> ATGTCAGCGTCTCTT          |
| FvL18 ( <i>Sma</i> I)-R    | <u>CCCGGGT</u> TAGAATTGAAGACCGTT       |
| FvL24 ( <i>Sal</i> I)-F    | <u>GTCGAC</u> ATGGTTCTCAAGACCGAAC      |
| FvL24 ( <i>Sma</i> I)-R    | <u>CCCGGGT</u> TAGCGCTTACCGCCA         |
| FvL24 ( <i>Eco</i> RI)-F   | <u>GAATTC</u> ATGGTTCTCAAGACCGAAC      |
| FvL24 ( <i>Bam</i> HI)-R   | <u>GGATCC</u> TTAGCGCTTACCGCCA         |

\*-Underlined sequences indicate various restriction sites.
