# Supplementary material for: Strawberry Vein Banding Virus P6 Protein Is a Translation Trans-Activator and Its Activity Can be Suppressed by FveIF3g
Source: Viruses. 2018 Dec 15;10(12):717. doi: 10.3390/v10120717 (PMC6316418; doi:10.3390/v10120717)
Supplement: Supplementary file 1 [file viruses-10-00717-s001.zip]

Archive with 4 entries (3 files):
- Supplementary Files/
- Supplementary Files/Fig. S1.pdf
- Supplementary Files/Fig. S2.pdf
- Supplementary Files/Table S1.pdf
